# Supplementary material
Source: publisher site journal article supplement (https://www.dovepress.com/article/531731)
Supplement: Supplementary file 1 [file 531731%20Revised%20%20Supplementary%20figures%20and%20tables_1_1.docx]

**
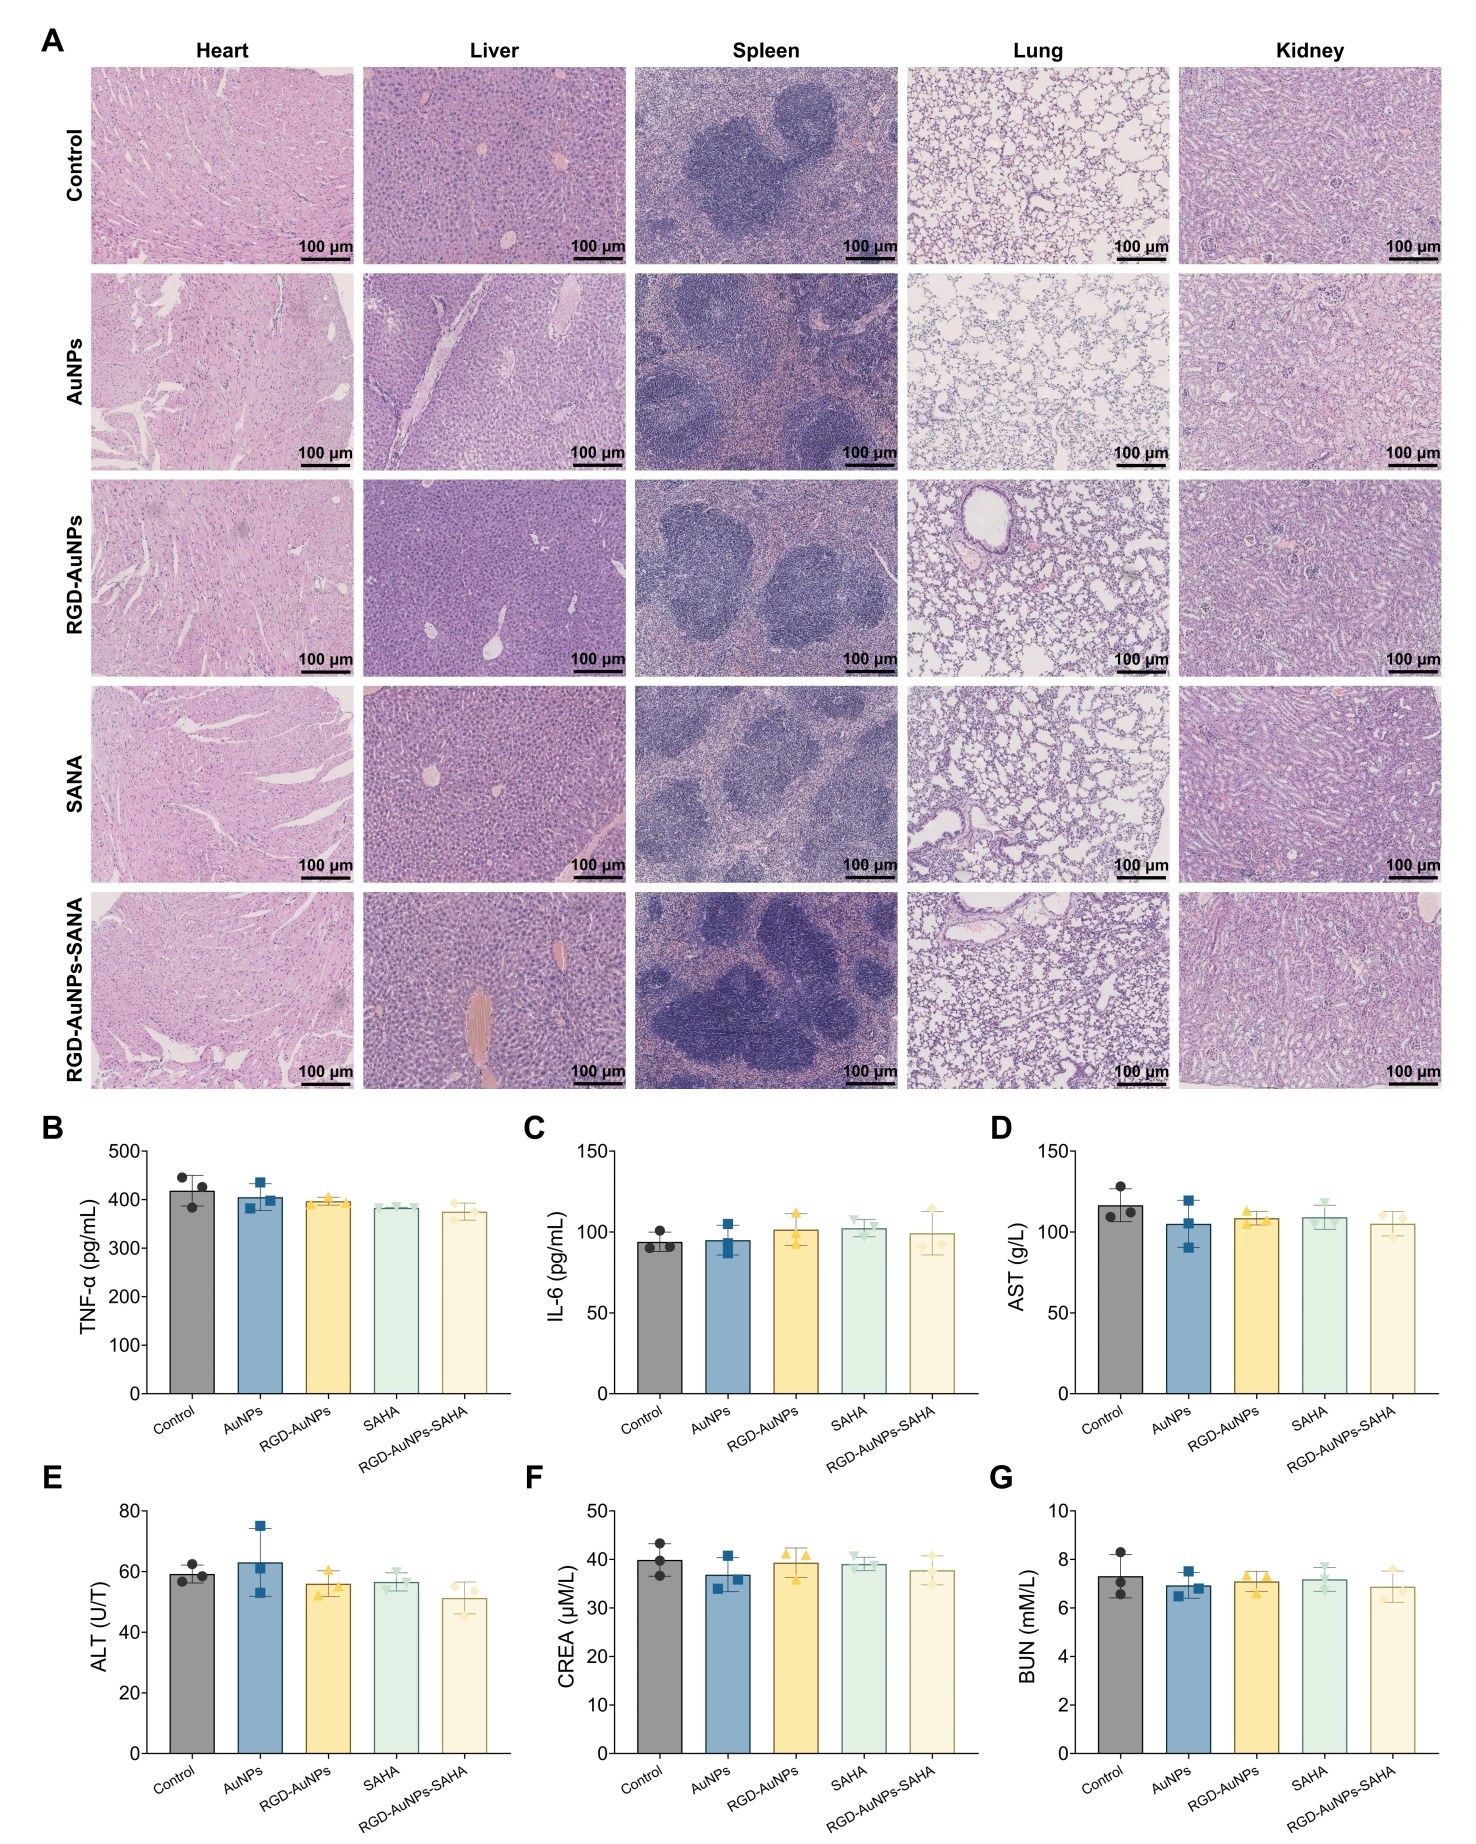
**

**Figure S1. Toxicity and Inflammatory Response of Mice Treated with RGD-AuNPs-SAHA.**

Note: (A) Histopathological examination of the heart, liver, spleen, kidney, and lung tissues in each group of mice; (B) ELISA measurement of blood tumor necrosis factor TNF-α levels; (C) ELISA measurement of blood interleukin IL-6 levels; (D) AST levels as an indicator of liver function; (E) ALT levels as a specific marker for liver function; (F) CREA levels for kidney function assessment; (G) BUN levels for evaluating both kidney and liver function. Each experiment was performed in triplicate (n=3). **p* < 0.05; ***p* < 0.01.

**
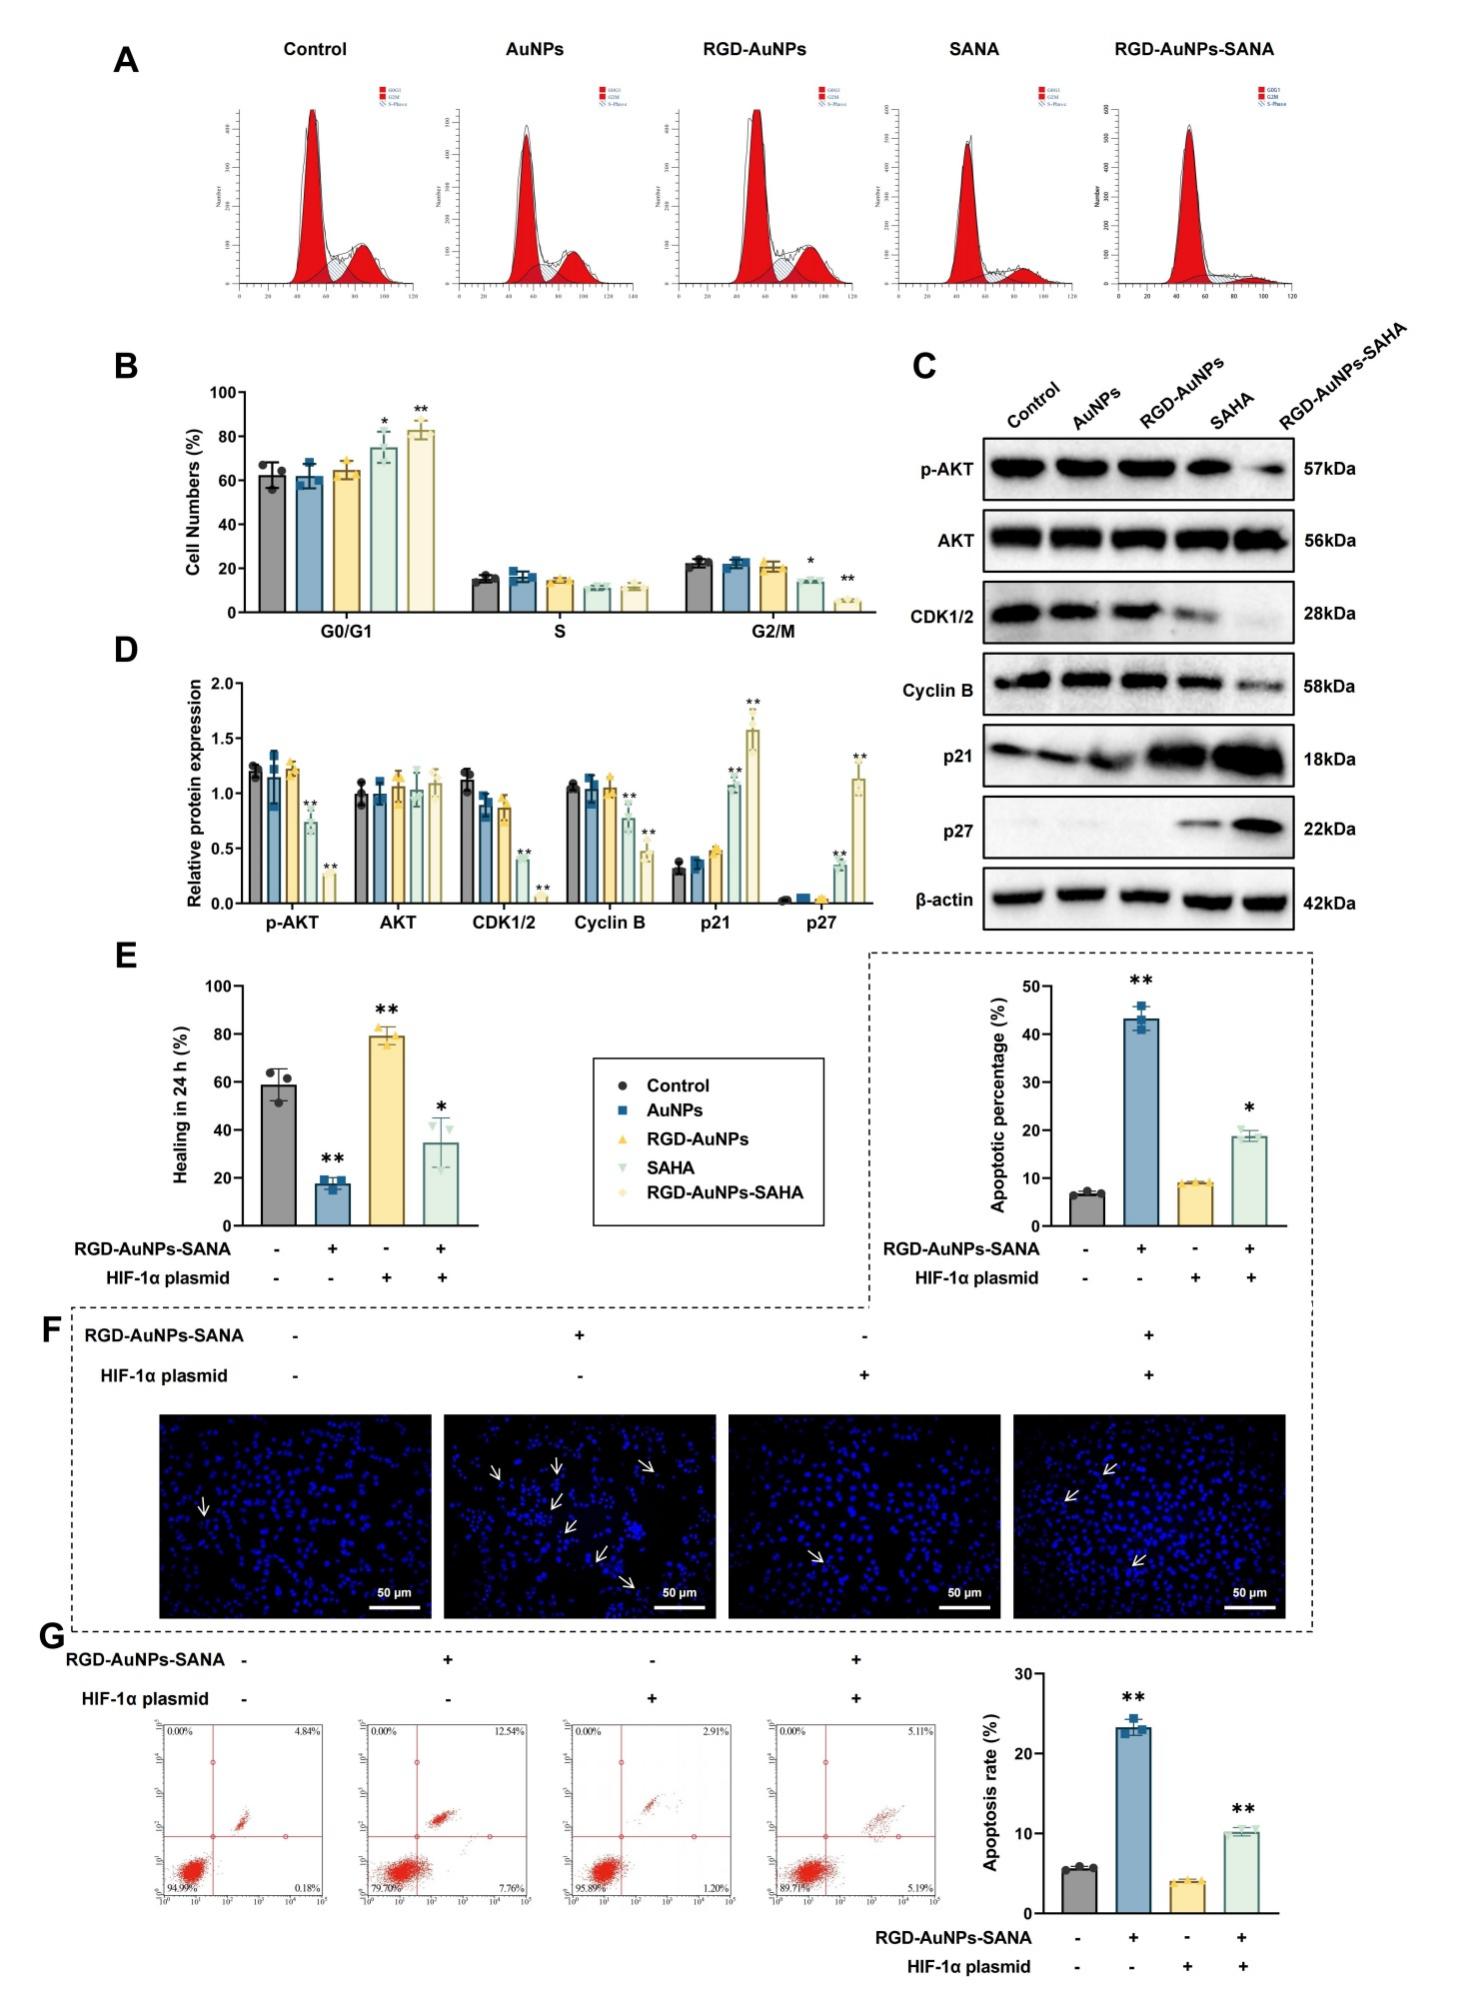
**

**Figure S2. Peptide-Modified AuNPs with SAHA Regulate the Hypoxic Microenvironment and Inhibit Lung Cancer Cells.**

Note: (A) Cell cycle distribution of each group analyzed by flow cytometry; (B) Quantitative analysis of the cell cycle distribution in each group; (C) Western blot analysis of P-AKT, AKT, CDK 1/2, Cyclin B, p21, and p27 expression; (D) Quantitative protein analysis of P-AKT, AKT, CDK 1/2, Cyclin B, p21, and p27; (E) Scratch assay evaluating the effects of HIF-1α overexpression and RGD-AuNPs-SAHA treatment on cell migration; (F) Hoechst-33258 staining showing nuclear morphology of A549 cells; (G) Flow cytometric detection of A549 cell apoptosis. Unless otherwise specified, experiments were performed in triplicate (n = 3). **p* < 0.05; ***p* < 0.01.

**Table S1. RT-PCR Primer Sequence.**

| **Name** | **Primer Sequence** |
| --- | --- |
| DAPDH | F GGAGCGAGATCCCTCCAAAAT |
| R GGCTGTTGTCATACTTCTCATGG |
| HIF-1α | F GAACGTCGAAAAGAAAAGTCTCG |
| R CCTTATCAAGATGCGAACTCACA |
| VEGF | F AGGGCAGAATCATCACGAAGT |
| R AGGGTCTCGATTGGATGGCA |
